# Supplementary material for: Distribution of Phenolic Compounds and Antioxidant Activity in Plant Parts and Populations of Seven Underutilized Wild Achillea Species
Source: MDPI journal article supplement (doi:10.3390/plants11030447), 2022-02-06
Supplement: s1 [file s1]

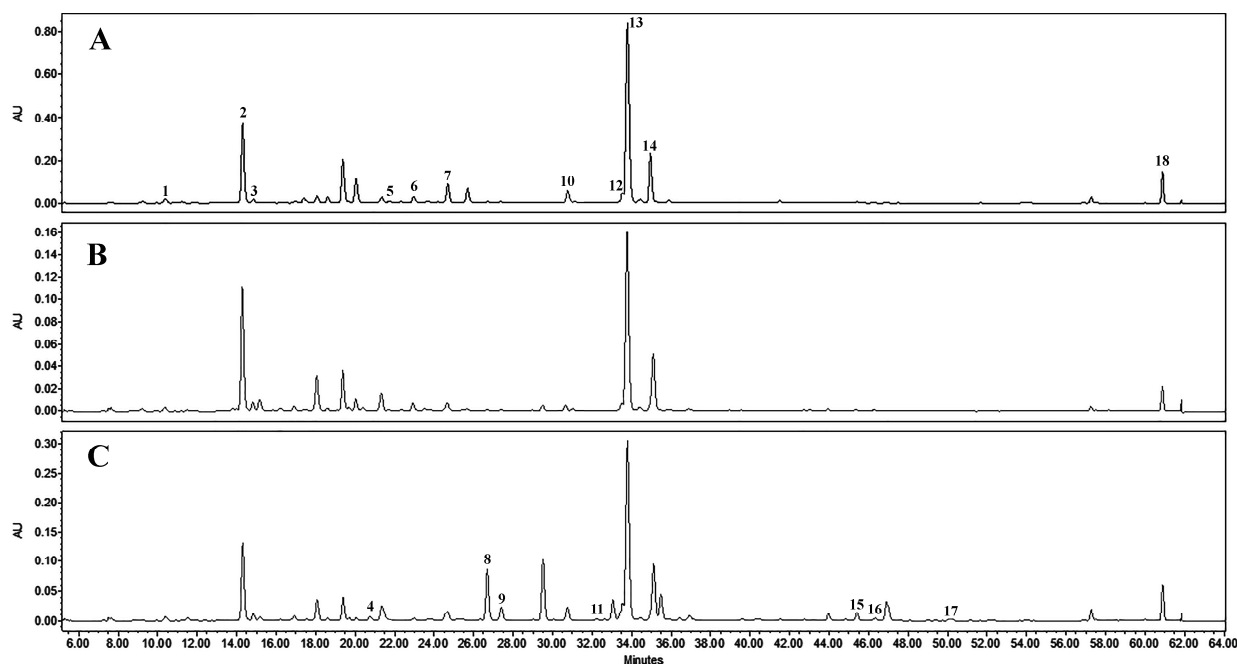

**Figure S1.** Representative HPLC-PDA chromatograms ( $\lambda = 330$  nm) of *Achillea* spp. (*A. setacea*) (A) leaves, (B) stems, and (C) inflorescences, showing separation of: 1—neochlorogenic acid, 2—chlorogenic acid, 3—4-caffeoylquinic acid, 4—luteolin-3,7-diglucoside, 5—caffeic acid, 6—luteolin-7-rutinoside, 7—rutin, 8—luteolin-7-glucoside, 9—isoquercitrin, 10—4,5-dicaffeoylquinic acid, 11—apigenin-7-glucoside, 12—1,5-dicaffeoylquinic acid, 13—3,5-dicaffeoylquinic acid, 14—3,4-dicaffeoylquinic acid, 15—luteolin, 16—quercetin, 17—apigenin, 18—santin.

**Table S1.** HPLC-PDA method identification and quantification parameters.

| Compound                  | Calibration curve        | Coefficient of determination ( $r^2$ ) | LOD ( $\mu\text{g/mL}$ ) | LOQ ( $\mu\text{g/mL}$ ) |
|---------------------------|--------------------------|----------------------------------------|--------------------------|--------------------------|
| Neochlorogenic acid       | $f(x) = 42500x - 15000$  | 0.99970                                | 0.32                     | 0.97                     |
| Chlorogenic acid          | $f(x) = 48500x + 47200$  | 0.99927                                | 0.27                     | 0.83                     |
| 4-caffeoylquinic acid     | $f(x) = 56700x - 91900$  | 0.99993                                | 0.11                     | 0.33                     |
| 3,4-dicaffeoylquinic acid | $f(x) = 56700x - 6790$   | 0.99999                                | 0.03                     | 0.09                     |
| 3,5-dicaffeoylquinic acid | $f(x) = 79100x - 36900$  | 0.99990                                | 0.09                     | 0.28                     |
| 1,5-dicaffeoylquinic acid | $f(x) = 70500x - 23900$  | 0.99937                                | 0.65                     | 1.57                     |
| 4,5-dicaffeoylquinic acid | $f(x) = 40400x - 9600$   | 0.99998                                | 0.05                     | 0.15                     |
| Caffeic acid              | $f(x) = 112000x + 24100$ | 0.99974                                | 0.37                     | 1.25                     |
| Quercitrin                | $f(x) = 39500x + 3580$   | 0.99961                                | 0.23                     | 0.71                     |
| Rutin                     | $f(x) = 30300x + 3050$   | 0.99993                                | 0.10                     | 0.30                     |
| Quercetin                 | $f(x) = 74800x - 70600$  | 0.99984                                | 0.13                     | 0.38                     |
| Isoquercitrin             | $f(x) = 39100x + 2560$   | 0.99995                                | 0.13                     | 0.39                     |
| Luteolin                  | $f(x) = 25200x - 26000$  | 0.99931                                | 0.48                     | 1.44                     |
| Luteolin-7-glucoside      | $f(x) = 54300x + 1040$   | 0.99998                                | 0.05                     | 0.15                     |
| Luteolin-7-rutinoside     | $f(x) = 40300x - 3980$   | 0.99999                                | 0.03                     | 0.08                     |
| Luteolin-3,7-diglucoside  | $f(x) = 31200x + 19100$  | 0.99929                                | 0.31                     | 0.94                     |
| Apigenin                  | $f(x) = 90100x + 9770$   | 0.99997                                | 0.03                     | 0.10                     |
| Apigenin-7-glucoside      | $f(x) = 68600x - 3820$   | 0.99992                                | 0.06                     | 0.17                     |
| Santin                    | $f(x) = 64700x - 132000$ | 0.99975                                | 0.47                     | 1.41                     |
